# Supplementary material for: Efficient PCR Amplification Protocol of Nuclear Microsatellites for Exuviae-Derived DNA of Cicada, Yezoterpnosia nigricosta
Source: Front Insect Sci. 2021 Jul 5;1:696886. doi: 10.3389/finsc.2021.696886 (PMC10926516; doi:10.3389/finsc.2021.696886)
Supplement: Supplementary file 1 [file Table_1.XLSX]

## Sheet: Sheet 1
Table S1. Characteristics of 17 microsatellite primers developed for Yezoterpnosia nigricosta
Locus	Primer sequences (5'-3')	Repeat motif	Ta (℃)	Directly labeling locus-specific	Size range (bp)	DDBJ accession no.
TeNi002s	F: CAATTTCGCAGAAAATGCAG R: TCTTGTTGTTACGGGCTTCA	(AT)6	57	FAM	93–99	LC537600
TeNi003 *	F: ACGTAGCAGAAAGACTAGTGGA R: ACTAGTGTGATAACCGCCACT	(GC)6	57	HEX	86–88	LC537601
TeNi012 *	F: TTCTCCGCCTGAATATAACACA R: CGCATTGCAAAGGAATGTGC	(AC)6	57	FAM	171–177	LC537602
TeNi019 *	F: TGATCGAATTCGGAACAGGCA R: TCCAAAGGATCACAGTGGCA	(GAT)6	57	FAM	103–127	LC537603
TeNi028	F: CCATGGTTATGTTGTTTATGCGC R: ACATCGTATCCAGACATGCAGT	(TG)6	57	NED	135–137	LC537604
TeNi029 *	F: TGGAAGGTAGTGGCTTGAGTG R: TGGGCACAATTTCTTTCACGC	(GC)6	57	HEX	129–137	LC537605
TeNi032 *	F: TATCATCTTGGCAGCGGGTG R: AAGCAACATCTGTGCATGCG	(CA)6	57	HEX	130–142	LC537606
TeNi038	F: TCACACGTGATGGAAACCGA R: CGCAGTAAATACACGAGTGCG	(CA)7	57	HEX	131–139	LC537607
TeNi040 *	F: GCGTACGAGTAAGTTATGCGC R: AACAGAAATCGGACTGATCATTAAA	(GT)7	57	NED	109–122	LC537608
TeNi041 *	F: TAAGTACAGGGTCGGCCGAT R: AAGGCGCGTTGTACAGAGAT	(GT)7	57	PET	120–128	LC537609
TeNi045 *	F: CGTTCACACTCTTAGTTTCCCA R: AAGGTAACATATGGAACAGTGGA	(TG)8	57	FAM	98–116	LC537610
TeNi047s *	F: CGGCATACATCTTGTTCACG R: ATCCAGGAGTCCACGTTTTG	(AG)8	57	HEX	140–196	LC537611
TeNi048	F: AAATACAGCCTTGCGTGGAA R: TACTGACACTCGCTTCAGGC	(TG)8	57	NED	160–168	LC537612
TeNi050	F: GATGTATTGACGTGCGCGAG R: CACTTGTATGTTTACCGTCAAACG	(GT)9	57	HEX	80–86	LC537613
TeNi051 *	F: CGAGATGGCTAGACAGAAAGGT R: CTGTGGCGGCTTAGATTTGC	(AG)9	57	FAM	92–122	LC537614
TeNi052 *	F: GTAGAGGTGCTCAGCTGGTG R: ACAGCCAGCTCTTTACTGCA	(GA)9	57	FAM	163–169	LC537615
TeNi053 *	F: TTATCGAAGCGAGGAAAAGC R: CGGTCTGGAACGCTTTAAGT	(AC)10	57	FAM	148-180	LC537616
Ta, annealing temperature; * examined loci in this study.
