# Supplementary material for: Efficient PCR Amplification Protocol of Nuclear Microsatellites for Exuviae-Derived DNA of Cicada, Yezoterpnosia nigricosta
Source: Front Insect Sci. 2021 Jul 5;1:696886. doi: 10.3389/finsc.2021.696886 (PMC10926516; doi:10.3389/finsc.2021.696886)
Supplement: Supplementary file 2 [file Table_2.XLSX]

## Sheet: Sheet 1
Table S2. PCR reaction conditions of four Taqs and five protocols
Taq & Protocol name	Typeit Multiplex PCR Kit		QIAGEN Multiplex PCR Kit Protocol 1		QIAGEN Multiplex PCR Kit Protocol 2		TaKaRa Ex Taq		TaKaRa LA Taq
PCR reaction component	2× Typeit Multiplex PCR Master Mix	2.5 μl	2× QIAGEN Multiplex PCR Master Mix	2.5 μl	2× QIAGEN Multiplex PCR Master Mix	2.5 μl	TaKaRa Ex Taq	0.025 μl	TaKaRa LA Taq	0.05 μl
	0.2 μM each of forward and reverse primer	0.5 μl	0.2 μM each of forward and reverse primer	0.5 μl	0.2 μM each of forward and reverse primer	0.5 μl	10× Ex Taq Buffer	0.5 μl	10× LA PCR Buffer II	0.5 μl
	RNase-free water	1.0 μl	RNase-free water	1.0 μl	RNase-free water	1.0 μl	dNTP Mixture	0.4 μl	25 mM MgCl2	0.5 μl
	genomic DNA	2–10 ng/μl	genomic DNA	2–10 ng/μl	genomic DNA	2–10 ng/μl	0.2 μM each of forward and reverse primer	0.5 μl	dNTP Mixture	0.8 μl
	Total	5.0 μl	Total	5.0 μl	Total	5.0 μl	RNase-free water	2.575 μl	0.2 μM each of forward and reverse primer	0.5 μl
							genomic DNA	2–10 ng/μl	RNase-free water	1.65 μl
							Total	5.0 μl	genomic DNA	2–10 ng/μl
									Total	5.0 μl
PCR conditions
Initial heat activation	95 ℃ for 5 min		95 ℃ for 15 min		95 ℃ for 15 min		94 ℃ for 1 min		94 ℃ for 1 min
Denaturation	95 ℃ for 30 s		94 ℃ for 30 s		94 ℃ for 30 s		94 ℃ for 30 s		94 ℃ for 30 s
Annealing	57 ℃ for 90 s		57 ℃ for 90 s		57 ℃ for 90 s		57 ℃ for 1 min		57 ℃ for 1 min
Extentension	72 ℃ for 30 s		72 ℃ for 90 s		72 ℃ for 1 min		72 ℃ for 1 min		72 ℃ for 2 min
Number of cycles	40		40		40		35		30
Final extension	60 ℃ for 30 min		72 ℃ for 10 min		60 ℃ for 30 min		72 ℃ for 2 min		72 ℃ for 3 min
