# Supplementary material for: Efficient PCR Amplification Protocol of Nuclear Microsatellites for Exuviae-Derived DNA of Cicada, Yezoterpnosia nigricosta
Source: Front Insect Sci. 2021 Jul 5;1:696886. doi: 10.3389/finsc.2021.696886 (PMC10926516; doi:10.3389/finsc.2021.696886)
Supplement: Supplementary file 3 [file Table_3.XLSX]

## Sheet: Table S3
Table S3. The number of successful individuals for PCR amplification at each locus
Sampling location	N	Microsatelite Locus Name
		TeNi003	TeNi051	TeNi045	TeNi019	TeNi040	TeNi041	TeNi029	TeNi032	TeNi047s	TeNi053	TeNi052	TeNi012
Sugadaira Resarch Station	64	19	27	24	16	22	28	24	15	12	18	20	26
Yatsugatake Forest Station	8	0	2	1	0	1	2	1	0	0	0	1	1
Nopporo Forest Park	8	1	2	1	0	1	1	0	0	0	0	1	1
Mt. Mukouzaka	8	2	3	6	3	6	2	2	2	0	1	7	3
Total	88	22	34	32	19	30	33	27	17	12	19	29	31
The microsatellites are listed from left (short) to right (long) in order of fragment sizes.
